# Supplementary material
Source: publisher figshare collection journal article supplement (https://acs.figshare.com/ndownloader/files/17260235)
Supplement: Supplementary file 1 [file 17260235]

# Supporting Information

## **Facile Design of Highly Effective $\text{CuCe}_x\text{Co}_{1-x}\text{O}_y$ Catalysts with Diverse Surface/Interface Structures towards NO Reduction by CO at Low Temperatures**

*Xinyang Wang<sup>†</sup>, Xinyong Li<sup>\*†</sup>, Jincheng Mu<sup>†</sup>, Shiyong Fan<sup>†</sup>, Liang Wang<sup>†</sup>, Guoqiang Gan<sup>†</sup>,  
Meichun Qin<sup>†</sup>, Ji Li<sup>†</sup>, Zeyu Li<sup>†</sup>, Dongke Zhang<sup>\*‡</sup>*

<sup>†</sup>State Key Laboratory of Fine Chemicals, Key Laboratory of Industrial Ecology and Environmental Engineering (MOE), School of Environmental Science and Technology, Dalian University of Technology, Dalian 116024, China

<sup>‡</sup> Centre for Energy (M473), The University of Western Australia, 35 Stirling Highway, Crawley, Western Australia 6009, Australia

\* Corresponding authors:

Xinyong Li, Email: xyli@dlut.edu.cn

Dongke Zhang, Email: Dongke.Zhang@uwa.edu.au

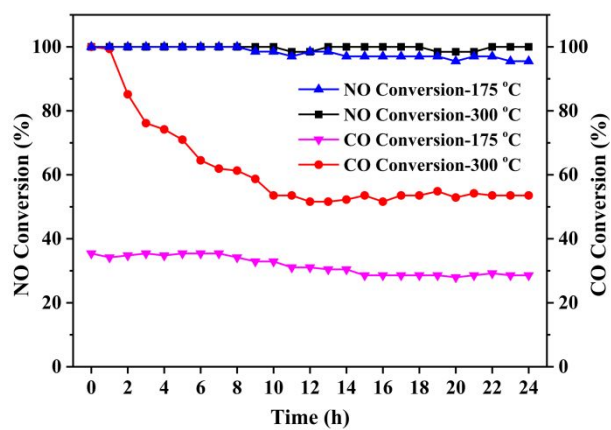

**Figure S1.** The stability test of  $\text{CuCe}_{0.2}\text{Co}_{0.8}\text{O}_y$  catalyst at 175 °C and 300 °C for 24 h. Reaction condition: 1000ppm NO, 2000ppm CO, He balance, GHSV = 50,000 h<sup>-1</sup>.

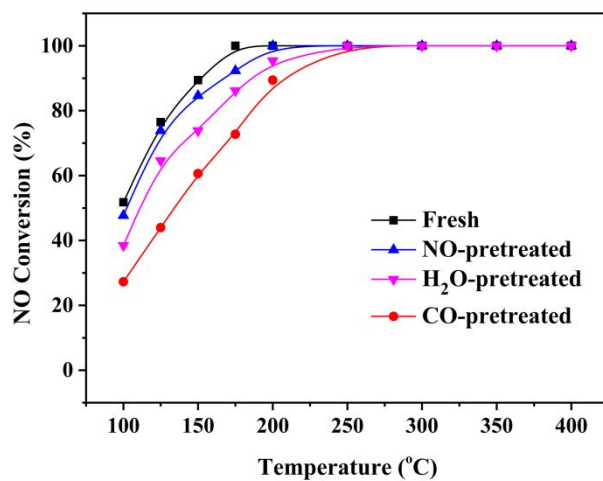

**Figure S2.** NO conversion of  $\text{CuCe}_{0.2}\text{Co}_{0.8}\text{O}_y$  catalyst pretreated under 5000 ppm CO, 5000 ppm NO and 10 %  $\text{H}_2\text{O}/\text{He}$  steam at 200 °C. Reaction condition: 1000ppm NO, 2000ppm CO, He balance, GHSV = 50,000  $\text{h}^{-1}$ .

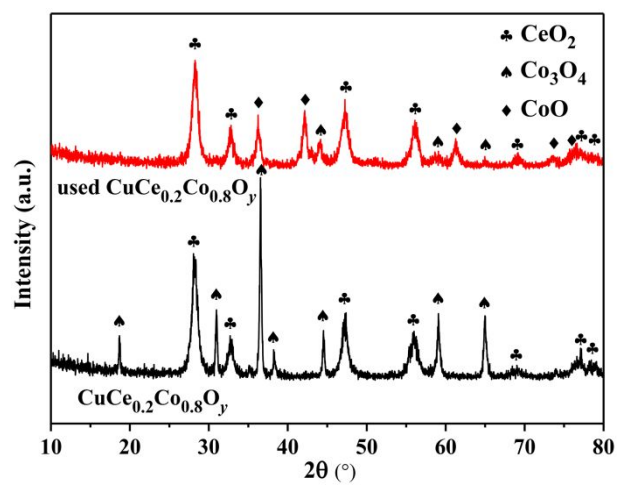

**Figure S3.** XRD patterns of fresh and used  $\text{CuCe}_{0.2}\text{Co}_{0.8}\text{O}_y$  catalysts.

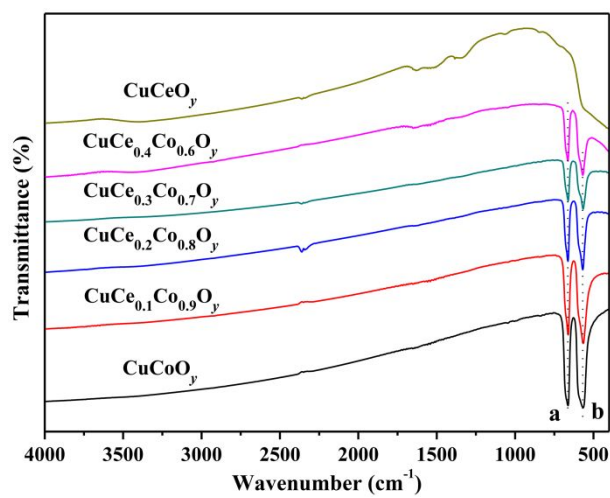

**Figure S4.** FT-IR spectra of  $\text{CuCe}_x\text{Co}_{1-x}\text{O}_y$  catalysts.

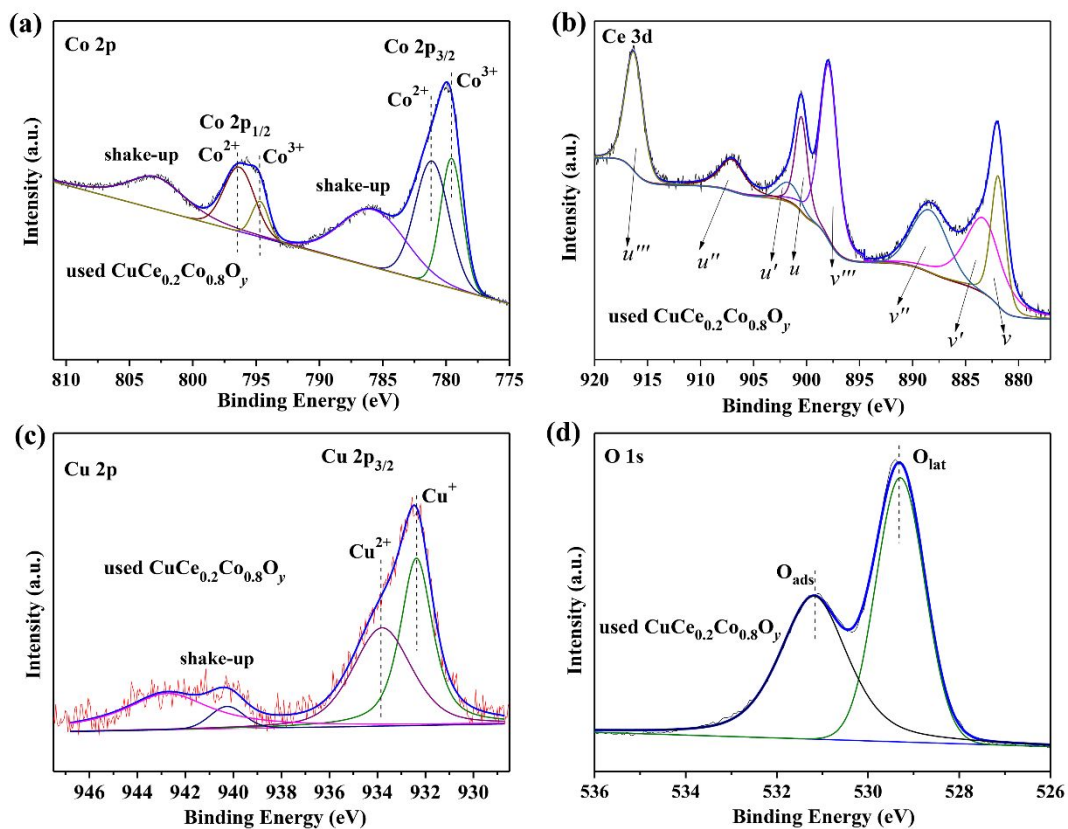

**Figure S5.** XPS profiles of (a) Co 2p, (b) Ce 3d, (c) Cu 2p and (d) O 1s of used  $\text{CuCe}_x\text{Co}_{1-x}\text{O}_y$  catalysts.

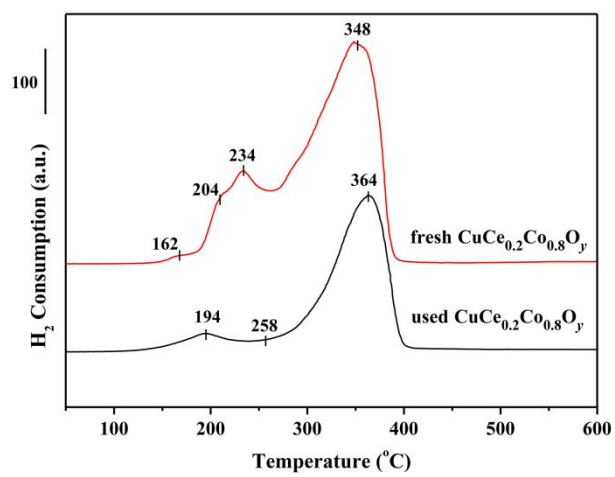

**Figure S6.** H<sub>2</sub>-TPR profiles of fresh and used CuCe<sub>0.2</sub>Co<sub>0.8</sub>O<sub>y</sub> catalyst.

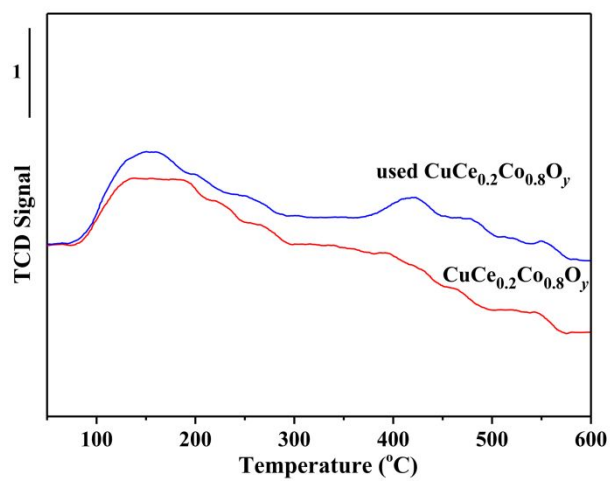

**Figure S7.** CO-TPD profile of fresh and used  $\text{CuCe}_{0.2}\text{Co}_{0.8}\text{O}_y$  catalyst.



**Table S1.** Comparison of NO conversion for NO reduction by CO over different catalysts.

| Catalysts                                                       | Reaction condition                                                             | NO conversion | Reference |
|-----------------------------------------------------------------|--------------------------------------------------------------------------------|---------------|-----------|
| $\text{CuCe}_{0.2}\text{Co}_{0.8}\text{O}_y$                    | 1000 ppm NO, 2000 ppm CO, He balance, GHSV = 50,000 h <sup>-1</sup>            | 175 °C, 100 % | This work |
| Fe-Co/ASC                                                       | 1000 ppm NO, 2000 ppm CO, N <sub>2</sub> balance, GHSV = 6000 h <sup>-1</sup>  | 175 °C, 70 %  | 1         |
| Cu/MCM-41                                                       | 250 ppm NO, 750 ppmCO, Flow rate = 80 mL/min                                   | 350 °C, 23 %  | 2         |
| 4% Cu/Fe-Ce                                                     | 800 ppm NO, 1600 ppm CO, N <sub>2</sub> balance, GHSV = 30,000 h <sup>-1</sup> | 175 °C, 100 % | 3         |
| Cu-Ce/CNTs                                                      | 250 ppm NO, 5000 ppm CO, He balance, GHSV = 12,600 h <sup>-1</sup>             | 175 °C, 70 %  | 4         |
| Al(Cu+Co+Ce)                                                    | 1200 ppm NO, 1200 ppm CO, GHSV = 26,000 h <sup>-1</sup>                        | 175 °C, 65 %  | 5         |
| CuO/Ce <sub>0.2</sub> Ti <sub>0.8</sub> O <sub>2</sub>          | 6.0% NO, 6.0% CO, He balance, GHSV = 5000 h <sup>-1</sup>                      | 175 °C, 45 %  | 6         |
| Cu/CeO <sub>2</sub>                                             | 5% NO, 10% CO, He balance, GHSV = 36,000 h <sup>-1</sup>                       | 175 °C, 83 %  | 7         |
| CuO-CoO <sub>x</sub> / $\gamma$ -Al <sub>2</sub> O <sub>3</sub> | 2.5% NO, 5% CO, He balance, GHSV = 12,000 mL g <sup>-1</sup> h <sup>-1</sup>   | 175 °C, 30 %  | 8         |
| Cu-Fe/CNTs                                                      | 5% NO, 10 % CO, He balance, GHSV = 60,000 h <sup>-1</sup>                      | 175 °C, 55 %  | 9         |
| CuO-MnO <sub>x</sub> /TiO <sub>2</sub>                          | 5% NO, 10% CO, He balance, GHSV = 12,000 h <sup>-1</sup>                       | 200 °C, 13 %  | 10        |

## References

- (1) Wang, L.; Cheng, X.; Wang, Z.; Ma, C.; Qin, Y., Investigation on Fe-Co binary metal oxides supported on activated semi-coke for NO reduction by CO. *Appl. Catal., B* **2017**, 201, 636.
- (2) Patel, A.; Shukla, P.; Rufford, T. E.; Rudolph, V.; Zhu, Z., Selective catalytic reduction of NO with CO using different metal-oxides incorporated in MCM-41. *Chem. Eng. J.* **2014**, 255, 437.
- (3) Cheng, X.; Zhang, X.; Su, D.; Wang, Z.; Chang, J.; Ma, C., NO reduction by CO over copper catalyst supported on mixed CeO<sub>2</sub> and Fe<sub>2</sub>O<sub>3</sub>: Catalyst design and activity test. *Appl. Catal., B* **2018**, 239, 485.
- (4) Gholami, Z.; Luo, G., Low-Temperature Selective Catalytic Reduction of NO by CO in the Presence of O<sub>2</sub> over Cu:Ce Catalysts Supported by Multiwalled Carbon Nanotubes. *Ind. Eng. Chem. Res.* **2018**, 57, 8871.
- (5) Spassova, I.; Velichkova, N.; Nihtianova, D.; Khristova, M., Influence of Ce addition on the catalytic behavior of alumina-supported Cu-Co catalysts in NO reduction with CO. *J. Colloid Interface Sci.* **2011**, 354, 777.
- (6) Jiang, X.; Huang, W.; Li, H.; Zheng, X., Catalytic Properties of CuO/Ce<sub>0.2</sub>Ti<sub>0.8</sub>O<sub>2</sub> and CuO/Ce<sub>0.5</sub>Ti<sub>0.5</sub>O<sub>2</sub> in the NO + CO Reaction. *Energy Fuels* **2010**, 24, 261.
- (7) Yao, X. J.; Gao, F.; Yu, Q.; Qi, L.; Tang, C. J.; Dong, L.; Chen, Y., NO reduction by CO over CuO-CeO<sub>2</sub> catalysts: effect of preparation methods. *Catal. Sci. Technol.* **2013**, 3, 1355.

(8) Zhang, L.; Yao, X.; Lu, Y.; Sun, C.; Tang, C.; Gao, F.; Dong, L., Effect of precursors on the structure and activity of CuO-CoO<sub>x</sub>/γ-Al<sub>2</sub>O<sub>3</sub> catalysts for NO reduction by CO. *J. Colloid Interface Sci.* **2018**, 509, 334.

(9) Dasireddy, V. D. B. C.; Likoza, B., Selective catalytic reduction of NO<sub>x</sub> by CO over bimetallic transition metals supported by multi-walled carbon nanotubes (MWCNT). *Chem. Eng. J.* **2017**, 326, 886.

(10) Sun, C.; Tang, Y.; Gao, F.; Sun, J.; Ma, K.; Tang, C.; Dong, L., Effects of different manganese precursors as promoters on catalytic performance of CuO-MnO<sub>x</sub>/TiO<sub>2</sub> catalysts for NO removal by CO. *Phys. Chem. Chem. Phys.* **2015**, 17, 15996.
